# Supplementary material
Source: PubMed Central journal article supplement (PMC7773408)
Supplement: jci-131-140522-s066.pdf [file jci-131-140522-s066.pdf]

| REAGENT or RESOURCE                                                         | SOURCE                                              | IDENTIFIER                          |
|-----------------------------------------------------------------------------|-----------------------------------------------------|-------------------------------------|
| ccRCC & NKT                                                                 | UC, Cincinnati                                      | Tumor Bank                          |
|                                                                             | NCI<br>Urology/Oncology<br>Branch                   | Drs. L. Schmidt and<br>WM Linehan   |
|                                                                             | UNC, Chapel Hill                                    | Tumor Bank                          |
|                                                                             | VAMC, Cincinnati                                    | Department of<br>Pathology, Dr. Hua |
| <b>Chemicals, Peptides, and Recombinant Proteins</b>                        |                                                     |                                     |
| <b>Ammonium Acetate (Crystalline/Certified ACS)</b>                         | Fisher Scientific                                   | #A637-500                           |
| <b>Acetonitrile</b>                                                         | Honeywell Burdick<br>& Jackson, Morris<br>Plain, NJ | LC015-2.5;<br>CAS# 75-05-8          |
| <b>Methanol HPLC Grade</b>                                                  | Thermo Fisher Sci                                   | #NC9428099;                         |
| <b>6-Phosphogluconic acid trisodium salt</b>                                | Sigma Aldrich                                       | # 53411-70-4                        |
| <b>N-Acetyl-L-aspartic acid</b>                                             | Sigma Aldrich                                       | # 997-55-7                          |
| <b>S-(5'-Adenosyl)-L-methionine chloride<br/>dihydrochloride</b>            | Sigma Aldrich                                       | # 86867-01-8                        |
| <b>L-Aspartic Acid</b>                                                      | Sigma Aldrich                                       | # 56-84-8                           |
| <b>Creatine</b>                                                             | Sigma Aldrich                                       | # 57-00-1                           |
| <b>Hypoxanthine Sodium Salt</b>                                             | Sigma Aldrich                                       | # 68-94-0                           |
| <b>sn-Glycerol 3 Phosphate Lithium Salt</b>                                 | Sigma Aldrich                                       | # 17989-41-2                        |
| <b>Coenzyme A Salt Hydrate</b>                                              | Sigma Aldrich                                       | # 55672-92-9                        |
| <b>Oxaloacetic Acid</b>                                                     | Sigma Aldrich                                       | #328-42-7                           |
| <b>Ammonium Bicarbonate</b>                                                 | Sigma Aldrich                                       | #1066-33-7                          |
| <b>B-Nicotinamide adenine dinucleotide- reduced<br/>sodium salt hydrate</b> | Sigma Aldrich                                       | #606-68-8                           |
| <b>B-Nicotinamide adenine dinucleotide</b>                                  | Sigma Aldrich                                       | # 53-84-9                           |
| <b>Acetyl coenzyme A lithium salt</b>                                       | Sigma Aldrich                                       | # 32140-51-5                        |
| <b>cis-Aconitic acid</b>                                                    | Sigma Aldrich                                       | # 585-84-2                          |
| <b>Sodium succinate dibasic hexahydrate</b>                                 | Sigma Aldrich                                       | # 6106-21-4                         |
| <b>a-D-Glucose 1-phosphate disodium salt hydrate</b>                        | Sigma Aldrich                                       | # 56401-20-8                        |
| <b>D-Glucose 6-phosphate sodium salt</b>                                    | Sigma Aldrich                                       | # 54010-71-8                        |
| <b>L-Glutathione oxidized</b>                                               | Sigma Aldrich                                       | # 27025-41-8                        |
| <b>L-Glutathione reduced</b>                                                | Sigma Aldrich                                       | # 70-18-8                           |
| <b>a-Ketoglutaric acid disodium salt hydrate</b>                            | Sigma Aldrich                                       | # 305-72-6                          |
| <b>6-phosphogluconic acid trisodium salt</b>                                | Sigma Aldrich                                       | # 53411-70-4                        |
| <b>N-Acetyl-DL-Aspartate</b>                                                | Sigma Aldrich                                       | # 997-55-7                          |
| <b>D-Glucose (1,2-<sup>13</sup>C<sub>2</sub>, 99%)</b>                      | Cambridge Isotope<br>Labs                           | # 138079-87-5                       |
| <b>SILAC Advanced DMEM/F-12 Flex Media</b>                                  | Thermo Fisher Sci                                   | A2494301                            |
| <b>Sodium arsenate dibasic heptahydrate</b>                                 | Sigma Aldrich                                       | #10048-95-0                         |
| <b>U-13C<sub>6</sub> glucose</b>                                            | Cambridge Isotope<br>Lab Inc                        | CLM-1396                            |
| <b>D- Sedoheptulose 7-phosphate lithium salt</b>                            | Sigma Aldrich                                       | 78832                               |

|                                                                      |                       |                  |
|----------------------------------------------------------------------|-----------------------|------------------|
| <b>D-Ribulose 5-phosphate disodium salt</b>                          | Sigma Aldrich         | 83899            |
| <b>Phospho(enol)pyruvic acid monosodium salt hydrate</b>             | Sigma Aldrich         | P0564            |
| <b>D-(-)-3-Phosphoglyceric acid disodium salt</b>                    | Sigma Aldrich         | P8877            |
| <b>L-Serine</b>                                                      | Sigma Aldrich         | S4500            |
| <b>Glycine</b>                                                       | Sigma Aldrich         | 410225           |
| <b>N-Acetyl-L-aspartic acid</b>                                      | Sigma Aldrich         | 920              |
| <b>L-Glutamic Acid</b>                                               | Sigma Aldrich         | G1251            |
| <b>Tris Base, Molecular Biology Grade</b>                            | Promega               | #0000249567      |
| <b>Ammonium Acetate, HPLC Grade</b>                                  | Thermo Fisher Sci     | #161197A         |
| <b>Phenylmethanesulfonyl fluoride</b>                                | Fluka BioChemika      | #132311921807105 |
| <b>Pierce Protease Inhibitor Mini Tablets, EDTA-Free</b>             | Thermo Fisher Sci     | 88666            |
| <b>Sodium Dodecyl Sulfate</b>                                        | MP Biomedicals        | 102918           |
| <b>Tris(hydroxymethyl) aminomethane, 99+%</b>                        | Acros Organicas       | 140500010        |
| <b>RNAlater ICE</b>                                                  | Ambion                | AM7030           |
| <b>Metallothionein rabbit liver</b>                                  | Sigma Aldrich         |                  |
| <b>(NH<sub>4</sub>)<sub>2</sub>HPO<sub>4</sub></b>                   | Thermo Fisher Sci     | #A686-500        |
| <b>HNO<sub>3</sub></b>                                               | Thermo Fisher Sci     | A509-P212        |
| <b>NaAsO<sub>2</sub></b>                                             | Sigma Aldrich         | S-7400           |
| <b>KH<sub>2</sub>AsO<sub>4</sub></b>                                 | Sigma Aldrich         | A6631            |
| <b>(CH<sub>3</sub>)<sub>2</sub>AsO<sub>2</sub>Na·3H<sub>2</sub>O</b> | Sigma Aldrich         | C0250            |
| <b>CH<sub>3</sub>AsO(ONa)<sub>2</sub>·6H<sub>2</sub>O</b>            | Supelco               | N11817           |
| <b>Pierce Protease Inhibitor Mini Tablets, EDTA-Free</b>             | Thermo Fisher Sci     | #A32965          |
| <b>Sodium Dodecyl Sulfate</b>                                        | MP Biomedicals, LLC   | #102918          |
| <b>Tris(hydroxymethyl) aminomethane, 99+%</b>                        | Acros Organics        | Lot#A0238109     |
| <b>Sodium Chloride Certified ACS Crystalline</b>                     | Thermo Fisher Sci     | #S271-500        |
| <b>Nitric Acid TraceMetal Grade</b>                                  | Thermo Fisher Sci     | #A509-P212       |
| <b>Arsenobetaine</b>                                                 | Sigma Aldrich         | #11093           |
| <b>Sodium (meta)arsenite</b>                                         | Sigma Aldrich         | #S-7400          |
| <b>Sodium cacodylate trihydrate</b>                                  | Sigma Aldrich         | #C0250           |
| <b>Disodium methyl arsonate hexahydrate</b>                          | Supelco               | #N11817          |
| <b>Potassium arsenate monobasic</b>                                  | Sigma Aldrich         | #A6631           |
| <b>ICP-MS Initial Calibration Verification Standard 1</b>            | SPEX Certiprep, USA   | #CI-ICV-1        |
| <b>Ammonium Phosphate Dibasic (Crystalline/Certified ACS)</b>        | Fisher Chemical       | #A686-500        |
| <b>Ammonium Hydroxide (Certified ACS Plus)</b>                       | Fisher Chemical       | #A669S-500       |
| <b>ICP-MS Internal Standard 3</b>                                    | High Purity Standards | #ICP-MS-IS-3     |

| <b>Critical Commercial Assays</b>                                                                 |                          |                                                                                                                                 |
|---------------------------------------------------------------------------------------------------|--------------------------|---------------------------------------------------------------------------------------------------------------------------------|
| <b>Total RNA isolation kit</b>                                                                    |                          | AM1560                                                                                                                          |
| <b>IROA TruQuant IQQ Workflow kit.</b>                                                            | IROA Technologies        | WORKFLOW                                                                                                                        |
| <b>mirVANA miRNA Isolation Kit</b>                                                                | Thermo Fisher Sci        | AM1560                                                                                                                          |
| <b>Experimental Models: Cell Lines</b>                                                            |                          |                                                                                                                                 |
| <b>786-O</b>                                                                                      | ATCC                     | CRL-1932                                                                                                                        |
| <b>HK2</b>                                                                                        | ATCC                     | CRL-2190                                                                                                                        |
| <b>U87 MG</b>                                                                                     | ATCC                     | HTB-14                                                                                                                          |
| <b>DG-75</b>                                                                                      | ATCC                     | CRL-2625                                                                                                                        |
| <b>Oligonucleotides</b>                                                                           |                          |                                                                                                                                 |
| <b>Primer Set: VHL Exon 1-1</b><br>FWD: GGTCTGGATCGCGGAGGG<br>REV: GCCCGGCCTCCATCTCCT             | (1)                      | N/A                                                                                                                             |
| <b>Primer Set: VHL Exon 1-2</b><br>FWD: AGTCGGGCGCCGAGGAGT<br>REV: CCGTCGAAGTTGAGCCATAC           | (1)                      | N/A                                                                                                                             |
| <b>Primer Set: VHL Exon 1-3</b><br>FWD: CCCAGGTCATCTGCAAT<br>REV: CTGCTGGGTCGGGCCTAA              | (1)                      | N/A                                                                                                                             |
| <b>Primer Set: VHL Exon 2</b><br>FWD: AAGTGCTGGGATTACAGGTGTGG<br>REV: TTTCAAGTGGTCTATCCTGTACTTACC | (1)                      | N/A                                                                                                                             |
| <b>Primer Set: VHL Exon 2</b><br>FWD: GTGGCTCTTTAACAACCTTTG<br>REV: CCTGTACTTACCACACAACCTAATC     | (1)                      | N/A                                                                                                                             |
| <b>Primer Set: VHL Exon 3-1</b><br>FWD: CACTGAGGATTTGGTTTTTGC<br>REV: TCCAGGTCTTTCTGCACATTT       | (1)                      | N/A                                                                                                                             |
| <b>Primer Set: VHL Exon 3-2</b><br>FWD: GACATCGTCAGGTCGCTCTA<br>REV: TCAAAAGCTGAGATGAAACAGTC      | (1)                      | N/A                                                                                                                             |
| <b>Software and Algorithms</b>                                                                    |                          |                                                                                                                                 |
| <b>Compound Discover 2.0</b>                                                                      | Thermo Fisher Scientific | <a href="https://mycompounddiscoverer.com/">https://mycompounddiscoverer.com/</a>                                               |
| <b>MassHunter software</b>                                                                        | Agilent                  |                                                                                                                                 |
| <b>Unscrambler X</b>                                                                              | CAMO Software, CA        |                                                                                                                                 |
| <b>Maven</b>                                                                                      | (2, 3)                   |                                                                                                                                 |
| <b>IROA Clusterfinder</b>                                                                         |                          | <a href="http://iroatech.com/page/IROA%20ClusterFinder%20Software">http://iroatech.com/page/IROA%20ClusterFinder%20Software</a> |
| <b>TopHat2</b>                                                                                    | Kim et al., 2013         |                                                                                                                                 |

|                                                           |                                                                                                                                                                     |                                                                                                     |
|-----------------------------------------------------------|---------------------------------------------------------------------------------------------------------------------------------------------------------------------|-----------------------------------------------------------------------------------------------------|
| fastQC                                                    | Andrews et al.,<br>2014                                                                                                                                             |                                                                                                     |
| RNA-SeQC                                                  | DeLuca et al.,<br>2012                                                                                                                                              |                                                                                                     |
| gimmR package                                             |                                                                                                                                                                     | <a href="https://github.com/uc-bd2k/gimmR">https://github.com/uc-bd2k/gimmR</a>                     |
| R package Complexheatmap                                  |                                                                                                                                                                     | <a href="https://github.com/jokergoo/ComplexHeatmap">https://github.com/jokergoo/ComplexHeatmap</a> |
| R package "Survival"                                      | CRAN                                                                                                                                                                |                                                                                                     |
| edgeR Bioconductor package                                | Robinson et al.,<br>2010                                                                                                                                            |                                                                                                     |
| Origin X software package                                 | Origin Lab, CA                                                                                                                                                      |                                                                                                     |
| Agilent Mass Hunter ICP-MS software                       | Agilent                                                                                                                                                             |                                                                                                     |
| MZCloud database                                          | Mzcloud.org                                                                                                                                                         |                                                                                                     |
| Mass Bank                                                 | Massbank.edu                                                                                                                                                        |                                                                                                     |
| Origin 2018b 64bit                                        | OriginLab<br>Corporation                                                                                                                                            |                                                                                                     |
| Sigma Plot 12.0                                           | Systat Software,<br>Inc.                                                                                                                                            |                                                                                                     |
| Pinet                                                     | <a href="https://doi.org/10.1101/607432">https://doi.org/10.1101/607432</a> , <a href="https://doi.org/10.1093/nar/gkaa436">https://doi.org/10.1093/nar/gkaa436</a> | <a href="http://pinet-server.org">http://pinet-server.org</a>                                       |
| Ilincs                                                    | Pilarczyk et al.,<br>bioRxiv 826271<br><a href="https://doi.org/10.1101/826271">https://doi.org/10.1101/826271</a>                                                  | <a href="http://www.ilincs.org/ilincs/">http://www.ilincs.org/ilincs/</a>                           |
| Agilent ChemStation                                       | Agilent                                                                                                                                                             |                                                                                                     |
| MetaboAnalyst                                             |                                                                                                                                                                     | <a href="https://www.metaboanalyst.ca/">https://www.metaboanalyst.ca/</a>                           |
| Enrichr                                                   |                                                                                                                                                                     | <a href="https://amp.pharm.mssm.edu/Enrichr/">https://amp.pharm.mssm.edu/Enrichr/</a>               |
| <b>Other</b>                                              |                                                                                                                                                                     |                                                                                                     |
| Luna 3µm NH2 1 mm i.d. x 100 mm column                    | Phenomenex                                                                                                                                                          | 00D-4377-A0                                                                                         |
| RNAlater ICE                                              | Thermo Fisher Sci                                                                                                                                                   | AM7030                                                                                              |
| NEBNext Poly(A) mRNA Magnetic Isolation Module            | New England Biolabs                                                                                                                                                 | E7490                                                                                               |
| Bioanalyzer                                               | Agilent                                                                                                                                                             | G2939BA                                                                                             |
| SMARTer Apollo NGS Library Prep System                    | Takara Bio                                                                                                                                                          | 640078                                                                                              |
| NEBNext Ultra II Directional RNA Library Prep Kit         | New England Biolabs                                                                                                                                                 | E7760                                                                                               |
| FastPrep- 24 5G Homogenizer                               | MP Biomedicals                                                                                                                                                      | 116005500                                                                                           |
| SecurityGuard ULTRA Holder for UHPLC Columns 2.1-4.6mm ID | Phenomenex                                                                                                                                                          | AJ0-9000                                                                                            |

|                                                                         |                       |             |
|-------------------------------------------------------------------------|-----------------------|-------------|
| <b>SecurityGuard ULTRA Cartridges UHPLC C18 for 2.1mm ID Columns</b>    | Phenomenex            | AJ0-8782    |
| <b>Synergi 2.5um Hydro-RP100 Å LC Column</b>                            | Phenomenex            | 00D-4387-B0 |
| <b>Triple quad Agilent 8800x ICP-MS-MS</b>                              | Agilent               |             |
| <b>Orbitrap Fusion Lumos Tribrid</b>                                    | Thermo Fisher Sci     |             |
| <b>Vanquish™ Flex Quaternary UHPLC system</b>                           | Thermo Fisher Sci     |             |
| <b>Agilent 1200 HPLC system</b>                                         | Agilent               |             |
| <b>Anion exchange separation column (PRP-X100, 250 × 4.1 mm, 10 µm)</b> | Hamilton, Switzerland |             |
| <b>Guard column (PRP-X100 20 × 2 mm, 10 µm)</b>                         | Hamilton Switzerland  |             |
| <b>TSK Gel 3000SW 7.8 x 30 mm, 10 µm particle size</b>                  |                       |             |
| <b>Polypropylene screw neck vial</b>                                    | Waters Corporation    | 186002640   |
| <b>HiSeq 1000 Sequencer</b>                                             | Illumina              | n/a         |

1. Yi Y, Mikhaylova O, Mamedova A, Bastola P, Biesiada J, Alshaikh E, et al. von Hippel-Lindau-dependent patterns of RNA polymerase II hydroxylation in human renal clear cell carcinomas. *Clinical cancer research : an official journal of the American Association for Cancer Research*. 2010;16(21):5142-52.
2. Melamud E, Vastag L, and Rabinowitz JD. Metabolomic analysis and visualization engine for LC-MS data. *Analytical chemistry*. 2010;82(23):9818-26.
3. Clasquin MF, Melamud E, and Rabinowitz JD. LC-MS data processing with MAVEN: a metabolomic analysis and visualization engine. *Curr Protoc Bioinformatics*. 2012;Chapter 14:Unit14.1.
4. Shamsaei B, Chojnacki S, Pilarczyk M, Najafabadi M, Niu W, Chen C, et al. piNET: a versatile web platform for downstream analysis and visualization of proteomics data. *Nucleic acids research*. 2020;48(W1):W85-w93.
